# Supplementary material for: Impact of COPD case finding on clinical care: a prospective analysis of the TargetCOPD trial
Source: PubMed Central journal article supplement (PMC7537458; doi:10.1136/bmjopen-2020-038286), 2020-10-05
Supplement: bmjopen-2020-038286supp001.pdf [file bmjopen-2020-038286supp001.pdf]

Supplementary Table 1 Clinical codes used to extract data on COPD-related care from GP electronic health records

| Variable                            | Variable (specific) | Read code v2                                                                                                    | Read code v3                                                                                                    |
|-------------------------------------|---------------------|-----------------------------------------------------------------------------------------------------------------|-----------------------------------------------------------------------------------------------------------------|
| Antibiotic rescue pack              |                     | "8IEZ","8BMW"                                                                                                   | "XaW9D","XaZp7"                                                                                                 |
| Anxiety screening                   |                     | "6897","388N"                                                                                                   | "Xab9E","XaIwe"                                                                                                 |
| Body mass index                     |                     | "22K%"                                                                                                          | "22K%"                                                                                                          |
| COPD Care plan                      |                     | "8CMV","66YI"                                                                                                   | "8CMV","XaIUt"                                                                                                  |
| Chest x-ray                         |                     | "536"                                                                                                           | "XE2az"                                                                                                         |
| Clinical COPD Questionnaire (CCQ)   |                     | "38Dd"                                                                                                          | "XaR6n"                                                                                                         |
| COPD Assessment Test (CAT)          |                     | "38Dg"                                                                                                          | "XaRFy"                                                                                                         |
| COPD exception reporting            |                     | "9h5%"                                                                                                          | "XaJ4R","XaJ4I","XaJ4k"                                                                                         |
| COPD review                         |                     | "66YM"                                                                                                          | "Xalet","XaXCb","XaXCa"                                                                                         |
| COPD severity                       |                     | "H39","H36","H37","H38"                                                                                         | "XaEIV","XaN4a","XaEiY","XaEiW"                                                                                 |
| Depression screening                |                     | "6896%","6891%","388P","388w","E204","3885","38G5","388f"                                                       | "6891%","Xalfw","XaNkT","62T1","XaYS4","XaLDN"                                                                  |
| Influenza vaccine                   |                     | "65E%","n47%","9OX5"                                                                                            | "65E%","n47%","XaIBI"                                                                                           |
| Inhaler technique assessed/status   |                     | "6636","663I","663H","6637","66Y4"                                                                              | "6636","663I","663H","6637","XaIQ0"                                                                             |
| Prednisolone                        |                     | "fe6%"                                                                                                          | "fe6%"                                                                                                          |
| Beclometasone dipropionate          |                     | "c61%","c66%"                                                                                                   | "c61%","c66%"                                                                                                   |
| Budesonide                          |                     | "c64%"                                                                                                          | "c64%"                                                                                                          |
| Budesonide + formoterol (Symbicort) |                     | "c67%"                                                                                                          | "c67%"                                                                                                          |
| Fluticasone + salmeterol (Seretide) |                     | "c1D%"                                                                                                          | "c1D%"                                                                                                          |
| Fluticasone propionate              |                     | "c65%"                                                                                                          | "c65%"                                                                                                          |
| Indacaterol                         |                     | "c1b%"                                                                                                          | "c1b%"                                                                                                          |
| Ipratropium bromide                 |                     | "c31%"                                                                                                          | "c31%"                                                                                                          |
| Salbutamol                          |                     | "c13%","c1E%"                                                                                                   | "c13%","c1E%"                                                                                                   |
| Salmeterol                          |                     | "c19%"                                                                                                          | "c19%"                                                                                                          |
| Terbutaline                         |                     | "c144","C145","C146","C147","c148","c14d","c14f","c14g","c14i","c14j","c14k","c14t","c14u","c14v","c14w","c14x" | "c144","C145","C146","C147","c148","c14d","c14f","c14g","c14i","c14j","c14k","c14t","c14u","c14v","c14w","c14x" |
| Aminophylline                       |                     | "c41%"                                                                                                          | "c41%"                                                                                                          |
| Theophylline                        |                     | "c43%"                                                                                                          | "c43%"                                                                                                          |
| MRC dyspnoea score                  |                     | "173H","173I","173J","173K","173L"                                                                              | "XaUIl","XaIUm","XaIUn","XaUo","XaIUi"                                                                          |
| Oxygen saturation                   |                     | "44YA"                                                                                                          | "X7708"                                                                                                         |
| Oxygen therapy                      |                     | "8771%"                                                                                                         | "8771%","X71a%","XALL8"                                                                                         |
| Palliative care patients            |                     | "9EB5","8CM1%"                                                                                                  | "XaJv2","XE2XB","XaCDx"                                                                                         |

| Variable                        | Variable (specific)                                                                                                             | Read code v2                                             | Read code v3                                                                            |
|---------------------------------|---------------------------------------------------------------------------------------------------------------------------------|----------------------------------------------------------|-----------------------------------------------------------------------------------------|
| Physical activity level (GPPAQ) |                                                                                                                                 | "138b","138X","138a","138Y"                              | "XaPPE","XaPP8","XaPPD","XaPPB"                                                         |
| Pneumococcal vaccine            |                                                                                                                                 | "6572","n4b%","8I3Q"                                     | "6572","n4b%","XaIyy"                                                                   |
| Pulmonary rehabilitation        |                                                                                                                                 | "8H7u","8FA%","9NSL","8I86","8IA9"                       | "XaIf9","XaIUp","XaIUq","XS7qP","XaIUs","XaZuM","XabGM","XaNQU"                         |
| Smoking cessation - medication  | Bupropion / Nicotine replacement therapy / Varenicline                                                                          | "du6%","du3%","du7%","du8%"                              | "du6%","du3%","du7%","du8%"                                                             |
| Smoking cessation               | Declined smoking cessation support                                                                                              | "9NdZ"                                                   | "XaRFh"                                                                                 |
| Smoking cessation               | Smoking cessation advice                                                                                                        | "8CAL"                                                   | "Ua1Nz"                                                                                 |
| Smoking status                  | Current/ex/never                                                                                                                | "137%"                                                   | "137%"                                                                                  |
| Spirometry                      | FEV1: actual / predicted / % predicted, FEV1/FVC ratio: actual / predicted / % predicted, FVC: actual / predicted / % predicted | "339S","339O","339P","339R","339M","339N","3396%","339Q" | "XaEFz","X77Qu","XaCJK","XaEFy","X77Ra","XaCFR","3396%","XaQmT","XaPpI","XaCJL","XaJ3K" |
| Spirometry                      |                                                                                                                                 | "745D4","8HRC"                                           | "XaXeg","XaK02"                                                                         |

*Supplementary Table 2 Clinical codes used to define a clinician diagnosis of COPD*

| Clinical system: EMIS Web and LV |                                                    |
|----------------------------------|----------------------------------------------------|
| H31                              | Chronic bronchitis                                 |
| H32                              | Emphysema                                          |
| H36                              | Mild chronic obstructive pulmonary disease         |
| H37                              | Moderate chronic obstructive pulmonary disease     |
| H38                              | Severe chronic obstructive pulmonary disease       |
| H39                              | Very severe chronic obstructive pulmonary disease  |
| H3A                              | End stage chronic obstructive airways disease      |
| H3y                              | Other specific chronic obstructive airways disease |
| H3z                              | Chronic obstructive airways disease                |
| Clinical system: System One      |                                                    |
| H3                               | COPD read codes in a cluster                       |

*Supplementary Table 3 Participant characteristics of those with and without additional electronic health record (EHR) or questionnaire data*

| <b>Participant characteristics</b>     | <b>With additional EHR data</b> | <b>With follow-up questionnaire data</b> | <b>Without additional EHR or follow-up questionnaire data</b> |
|----------------------------------------|---------------------------------|------------------------------------------|---------------------------------------------------------------|
| Mean age (SD)                          | 63.8 (9.4)                      | 64.7 (8.9)                               | 63.2 (10.2)                                                   |
| % Male                                 | 62.2                            | 58.7                                     | 54.2                                                          |
| % Current smoker                       | 37.7                            | 29.2                                     | 37.3                                                          |
| Mean FEV <sub>1</sub> % predicted (SD) | 86.3 (18.1)                     | 87.8 (17.9)                              | 84.8 (18.4)                                                   |

*Supplementary Table 4 Participant characteristics of those with questionnaire data (n=375)*

| <b>Participant characteristics</b> |                         | <b>N</b> | <b>(%)</b>  |
|------------------------------------|-------------------------|----------|-------------|
| Median age (IQR)                   |                         | 65.8     | (58.8-71.0) |
| Sex                                | Male                    | 220      | (58.7)      |
| Smoking status                     | Current                 | 77       | (20.5)      |
|                                    | Former                  | 202      | (53.9)      |
|                                    | Never                   | 41       | (10.9)      |
| FEV <sub>1</sub> % predicted       | Mean                    | 87.8     | (17.9)      |
|                                    | ≥80                     | 249      | (66.4)      |
|                                    | 50-79                   | 121      | (32.3)      |
|                                    | <50                     | 5        | (1.3)       |
| Comorbidities                      | Asthma                  | 31       | (8.3)       |
|                                    | Ischaemic heart disease | 22       | (5.9)       |
|                                    | Diabetes                | 20       | (5.3)       |
|                                    | Depression              | 5        | (1.3)       |
|                                    | Anxiety                 | 6        | (1.6)       |
| CAT score (median, IQR)            |                         | 12       | (7-19)      |
| Symptoms                           | MRC dyspnoea ≥3         | 148      | (39.5)      |
|                                    | Chronic cough           | 128      | (34.1)      |
|                                    | Phlegm                  | 194      | (51.7)      |
|                                    | Wheeze                  | 274      | (73.1)      |

CAT=COPD Assessment Test, FEV<sub>1</sub>=forced expiratory volume in 1 second

Supplementary Table 5 Clinical care\* of participants with electronic health record data who were newly diagnosed with COPD by case-finding and usual care

|                                        |                           | Diagnostic approach     |          |                       |           |
|----------------------------------------|---------------------------|-------------------------|----------|-----------------------|-----------|
|                                        |                           | Case finding<br>(n=341) |          | Usual care<br>(n=188) |           |
|                                        |                           | N**                     | (%)      | N**                   | (%)       |
| <b>Clinical assessment</b>             |                           |                         |          |                       |           |
| MRC score recorded                     |                           | 107                     | (31.4)   | 176                   | (93.6)    |
| CAT score recorded                     |                           | 39                      | (11.4)   | 102                   | (54.3)    |
| Spirometry undertaken                  |                           | 101                     | (29.6)   | 147                   | (78.2)    |
| COPD severity recorded                 |                           | 48                      | (14.1)   | 118                   | (62.8)    |
| BMI recorded                           |                           | 277                     | (81.2)   | 178                   | (94.7)    |
| Oxygen saturations recorded            |                           | 50                      | (14.7)   | 66                    | (35.1)    |
| CXR undertaken                         |                           | 22                      | (6.5)    | 20                    | (10.6)    |
| Depression screen undertaken           |                           | 71                      | (20.8)   | 64                    | (34.0)    |
| <b>Clinical intervention</b>           |                           |                         |          |                       |           |
| Listed on COPD register                |                           | 78                      | (22.9)   | 175                   | (93.1)    |
| Care plan recorded                     |                           | 41                      | (12.0)   | 119                   | (63.3)    |
| Annual review undertaken               |                           | 95                      | (27.9)   | 176                   | (93.6)    |
| Smoking cessation counselling provided |                           | 185                     | (54.3)   | 154                   | (81.9)    |
| Nicotine replacement therapy           |                           | 39                      | (11.4)   | 29                    | (15.4)    |
| Influenza vaccination provided         |                           | 245                     | (71.8)   | 144                   | (76.6)    |
| Pneumococcal vaccine provided          |                           | 29                      | (8.5)    | 28                    | (14.9)    |
| Pulmonary rehabilitation provided      |                           | 20                      | (5.9)    | 52                    | (27.7)    |
| Inhaler technique assessed             |                           | 73                      | (21.4)   | 140                   | (74.5)    |
| Inhalers prescribed                    | Salbutamol                | 146                     | (42.8)   | 167                   | (88.8)    |
|                                        | Ipratropium               | 8                       | (2.3)    | 15                    | (8.0)     |
|                                        | Salmeterol                | 3                       | (0.9)    | 15                    | (8.0)     |
|                                        | Fluticasone               | 3                       | (0.9)    | 1                     | (0.5)     |
|                                        | Budesonide                | 1                       | (0.3)    | 0                     | (0.0)     |
|                                        | Beclometasone             | 26                      | (7.6)    | 23                    | (12.2)    |
|                                        | Fluticasone/salmeterol    | 37                      | (10.9)   | 77                    | (41.0)    |
|                                        | Budesonide/formoterol     | 12                      | (3.5)    | 26                    | (13.8)    |
|                                        | Any of the above inhalers | 151                     | (44.3)   | 172                   | (91.5)    |
| Antibiotic rescue pack                 |                           | 11                      | (3.2)    | 48                    | (25.5)    |
| Prednisolone                           |                           | 69                      | (20.2)   | 114                   | (60.6)    |
| <b>Clinical care score</b>             | <5                        | 225                     | (66.0)   | 17                    | (9.0)     |
|                                        | 5 to 9                    | 83                      | (24.3)   | 73                    | (38.8)    |
|                                        | ≥10                       | 33                      | (9.7)    | 98                    | (52.1)    |
|                                        | Median (IQR)              | 4                       | (2 to 6) | 11                    | (9 to 13) |

\*Includes data from the start up to 2 years following the end of the TargetCOPD trial

\*\*Number of participants who received the clinical assessment or intervention

BMI=body mass index, CAT=COPD Assessment Test, IQR=interquartile range, MRC=Medical Research Council

*Supplementary Table 6 Multilevel linear regression model assessing the association between the clinical care score\* and participant characteristics, among those with electronic health record data (n=467)*

| <b>Participant characteristics</b> | <b>a<math>\beta</math>*</b> | <b>(95% CI)</b> | <b>p</b> |
|------------------------------------|-----------------------------|-----------------|----------|
| Age                                | 0.03                        | (0.00, 0.05)    | 0.022    |
| Sex (male)                         | -0.35                       | (-0.80, 0.09)   | 0.121    |
| Smoking status                     |                             |                 |          |
| Ex-smoker                          | 0.01                        | (-0.84, 0.86)   | 0.987    |
| Current smoker                     | 1.09                        | (0.21, 1.97)    | 0.015    |
| No. of comorbidities               | 0.32                        | (0.09, 0.55)    | 0.006    |
| Case-found vs. routinely diagnosed | -0.48                       | (-1.21, 0.24)   | 0.189    |
| Listed on COPD register            | 6.15                        | (5.49, 6.82)    | <0.001   |

\* Includes data from the start up to 2 years following the end of the TargetCOPD trial
